# Supplementary material
Source: PubMed Central journal article supplement (PMC4018951)
Supplement: jn.113.189407_nutrition189407SupplementaryData1.pdf [file jn.113.189407_nutrition189407SupplementaryData1.pdf]

Online Supporting Material

**Supplemental TABLE 1. Multivariate HRs<sup>1</sup> and 95% CIs for all-cause mortality for each component of the HEI-2010, AHEI-2010, aMED, and DASH Score among men<sup>2</sup>**

| Component                                     | HEI-2010                                        | AHEI-2010                  | aMED                                      | DASH                       |
|-----------------------------------------------|-------------------------------------------------|----------------------------|-------------------------------------------|----------------------------|
| Whole Grains                                  | <b>0.977 (0.973-0.980)</b>                      | <b>0.958 (0.952-0.964)</b> | <b>0.896 (0.880-0.912)</b>                | <b>0.951 (0.945-0.957)</b> |
| Total Vegetables                              | 0.993 (0.986-1.001)                             | —                          | —                                         | —                          |
| Vegetables                                    | —                                               | <b>0.993 (0.989-0.996)</b> | <b>0.973 (0.955-0.991)</b>                | <b>0.976 (0.970-0.983)</b> |
| Excluding Potatoes                            |                                                 |                            |                                           |                            |
| Greens and Beans                              | <b>0.993 (0.987-0.998)</b>                      | —                          | —                                         | —                          |
| Total Fruit                                   | 0.998 (0.992-1.005)                             | <b>0.992 (0.989-0.994)</b> | <b>0.982 (0.964-0.999)</b>                | <b>0.993 (0.986-0.999)</b> |
| Whole Fruit                                   | <b>0.991 (0.984-0.997)</b>                      | —                          | —                                         | —                          |
| Nuts and Legumes                              | —                                               | <b>0.991 (0.988-0.994)</b> | —                                         | <b>0.978 (0.972-0.985)</b> |
| Nuts                                          | —                                               | —                          | <b>0.965 (0.948-0.982)</b>                | —                          |
| Legumes                                       | —                                               | —                          | 0.987 (0.970-1.004)                       | —                          |
| Seafood and Plant Proteins                    | <b>0.977 (0.970-0.983)</b>                      | —                          | —                                         | —                          |
| Fish                                          | —                                               | —                          | <b>0.956 (0.940-0.973)</b>                | —                          |
| Total Protein Foods                           | 0.997 (0.986-1.008)                             | —                          | —                                         | —                          |
| Low-Fat Dairy                                 | 0.998 (0.995-1.001)                             | —                          | —                                         | 0.995 (0.989-1.002)        |
| Ratio of Fatty Acids                          | <b>PUFA + MUFA/SFA:<br/>0.981 (0.976-0.984)</b> | —                          | <b>MUFA/SFA: 0.940 (0.924-<br/>0.956)</b> | —                          |
| Trans Fat                                     | —                                               | <b>0.987 (0.983-0.991)</b> | —                                         | —                          |
| EPA + DHA                                     | —                                               | <b>0.984 (0.981-0.988)</b> | —                                         | —                          |
| PUFA                                          | —                                               | <b>0.990 (0.986-0.993)</b> | —                                         | —                          |
| Alcohol                                       | —                                               | <b>0.980 (0.978-0.983)</b> | <b>0.886 (0.865-0.907)</b>                | —                          |
| Red & Processed Meat                          | —                                               | <b>0.990 (0.987-0.993)</b> | <b>0.932 (0.914-0.950)</b>                | <b>0.977 (0.969-0.984)</b> |
| Refined Grains                                | <b>1.024 (1.020-1.027)</b>                      | —                          | —                                         | —                          |
| Empty Calories                                | <b>0.987 (0.985-0.989)</b>                      | —                          | —                                         | —                          |
| Sugar Sweetened Beverages<br>and Fruit Juices | —                                               | <b>1.004 (1.002-1.006)</b> | —                                         | —                          |
| Sugar Sweetened Beverages                     | —                                               | —                          | —                                         | 1.005 (0.997-1.013)        |
| Sodium                                        | <b>0.991 (0.987-0.994)</b>                      | <b>1.007 (1.002-1.012)</b> | —                                         | <b>1.014 (1.004-1.024)</b> |

<sup>1</sup>HR for 1 point increase in component score.

<sup>2</sup>Adjusted for age, race/ethnicity, education, marital status, physical activity, smoking, energy, body mass index, diabetes, alcohol (HEI-2010 and DASH only), hormone replacement therapy (women only), and the modified total index score for each index (total score-component *i*). HEI-2010, Healthy Eating Index-2010; AHEI-2010, Alternate Healthy Eating Index-2010; aMED, Alternate Healthy Eating Index; DASH, Dietary Approaches to Stop Hypertension.

Online Supporting Material

**Supplemental TABLE 2. Multivariate HRs<sup>1</sup> and 95% CIs for all-cause mortality for each component of the HEI-2010, AHEI-2010, aMED, and DASH Score among women<sup>2</sup>**

| Component                                     | HEI-2010                                       | AHEI-2010                   | aMED                                     | DASH                       |
|-----------------------------------------------|------------------------------------------------|-----------------------------|------------------------------------------|----------------------------|
| Whole Grains                                  | <b>0.977 (0.973-0.982)</b>                     | <b>0.955 (0.947-0.964)</b>  | <b>0.886 (0.865-0.907)</b>               | <b>0.949 (0.941-0.957)</b> |
| Total Vegetables                              | <b>0.988 (0.978-0.9995)</b>                    | —                           | —                                        | —                          |
| Vegetables                                    | —                                              | <b>0.993 (0.988-0.997)</b>  | 0.977 (0.953-1.001)                      | <b>0.976 (0.967-0.985)</b> |
| Excluding Potatoes                            |                                                |                             |                                          |                            |
| Greens and Beans                              | <b>0.974 (0.967-0.981)</b>                     | —                           | —                                        | —                          |
| Total Fruit                                   | 1.004 (0.994-1.014)                            | <b>0.993 (0.989-0.996)</b>  | 0.982 (0.959-1.006)                      | 1.001 (0.992-1.010)        |
| Whole Fruit                                   | 0.992 (0.982-1.002)                            | —                           | —                                        | —                          |
| Nuts and Legumes                              | —                                              | <b>0.987 (0.983-0.991)</b>  | —                                        | <b>0.966 (0.958-0.975)</b> |
| Nuts                                          | —                                              | —                           | <b>0.943 (0.921-0.965)</b>               | —                          |
| Legumes                                       | —                                              | —                           | <b>0.964 (0.942-0.986)</b>               | —                          |
| Seafood and Plant Proteins                    | <b>0.971 (0.963-0.979)</b>                     | —                           | —                                        | —                          |
| Fish                                          | —                                              | —                           | <b>0.951 (0.929-0.974)</b>               | —                          |
| Total Protein Foods                           | 0.991 (0.980-1.003)                            | —                           | —                                        | —                          |
| Low-Fat Dairy                                 | <b>0.992 (0.988-0.996)</b>                     | —                           | —                                        | <b>0.981 (0.972-0.989)</b> |
| Ratio of Fatty Acids                          | <b>PUFA + MUFA/SF:<br/>0.988 (0.984-0.991)</b> | —                           | <b>MUFA/SF: 0.963 (0.941-<br/>0.984)</b> | —                          |
| Trans Fat                                     | —                                              | <b>0.988 (0.983-0.992)</b>  | —                                        | —                          |
| EPA + DHA                                     | —                                              | <b>0.987 (0.982-0.992)</b>  | —                                        | —                          |
| PUFA                                          | —                                              | <b>0.995 (0.991-0.9997)</b> | —                                        | —                          |
| Alcohol                                       | —                                              | <b>0.984 (0.980-0.988)</b>  | <b>0.873 (0.842-0.905)</b>               | —                          |
| Red & Processed Meat                          | —                                              | <b>0.981 (0.976-0.986)</b>  | <b>0.916 (0.893-0.939)</b>               | <b>0.981 (0.972-0.991)</b> |
| Refined Grains                                | <b>1.022 (1.017-1.026)</b>                     | —                           | —                                        | —                          |
| Empty Calories                                | <b>0.991 (0.988-0.993)</b>                     | —                           | —                                        | —                          |
| Sugar Sweetened Beverages<br>and Fruit Juices | —                                              | 0.998 (0.996-1.001)         | —                                        | —                          |
| Sugar Sweetened Beverages                     | —                                              | —                           | —                                        | <b>0.980 (0.971-0.989)</b> |
| Sodium                                        | <b>0.986 (0.982-0.991)</b>                     | 0.998 (0.991-1.004)         | —                                        | 0.995 (0.982-1.008)        |

<sup>1</sup>HR for 1 point increase in component score.

<sup>2</sup>Adjusted for age, race/ethnicity, education, marital status, physical activity, smoking, energy, body mass index, diabetes, alcohol (HEI-2010 and DASH only), hormone replacement therapy (women only), and the modified total index score for each index (total score-component *i*). HEI-2010, Healthy Eating Index-2010; AHEI-2010, Alternate Healthy Eating Index-2010; aMED, Alternate Healthy Eating Index; DASH, Dietary Approaches to Stop Hypertension.

**Online Supporting Material**

**Supplemental TABLE 3. Multivariate HRs<sup>1</sup> and 95% CIs for cardiovascular disease mortality for each component of the HEI-2010, AHEI-2010, aMED, and DASH Score among men<sup>2</sup>**

| Component                                     | HEI-2010                                       | AHEI-2010                  | aMED                                     | DASH                       |
|-----------------------------------------------|------------------------------------------------|----------------------------|------------------------------------------|----------------------------|
| Whole Grains                                  | <b>0.977 (0.971-0.984)</b>                     | <b>0.961 (0.949-0.972)</b> | <b>0.898 (0.868-0.928)</b>               | <b>0.951 (0.940-0.963)</b> |
| Total Vegetables                              | 0.996 (0.981-1.011)                            | —                          | —                                        | —                          |
| Vegetables<br>Excluding Potatoes              | —                                              | 1.001 (0.994-1.008)        | 0.981 (0.947-1.016)                      | <b>0.984 (0.972-0.997)</b> |
| Greens and Beans                              | <b>0.987 (0.977-0.997)</b>                     | —                          | —                                        | —                          |
| Total Fruit                                   | 1.014 (1.001-1.028)                            | 0.997 (0.992-1.002)        | 1.028 (0.994-1.063)                      | 1.012 (0.999-1.025)        |
| Whole Fruit                                   | <b>0.994 (0.982-1.006)</b>                     | —                          | —                                        | —                          |
| Nuts and Legumes                              | —                                              | <b>0.990 (0.984-0.995)</b> | —                                        | <b>0.968 (0.956-0.980)</b> |
| Nuts                                          | —                                              | —                          | <b>0.945 (0.914-0.977)</b>               | —                          |
| Legumes                                       | —                                              | —                          | 1.010 (0.977-1.045)                      | —                          |
| Seafood and Plant Proteins                    | <b>0.968 (0.957-0.980)</b>                     | —                          | —                                        | —                          |
| Fish                                          | —                                              | —                          | <b>0.945 (0.914-0.977)</b>               | —                          |
| Total Protein Foods                           | 0.991 (0.972-1.010)                            | —                          | —                                        | —                          |
| Low-Fat Dairy                                 | 1.001 (0.995-1.006)                            | —                          | —                                        | 0.998 (0.986-1.011)        |
| Ratio of Fatty Acids                          | <b>PUFA + MUFA/SF:<br/>0.984 (0.978-0.989)</b> | —                          | <b>MUFA/SF: 0.937 (0.908-<br/>0.968)</b> | —                          |
| Trans Fat                                     | —                                              | <b>0.988 (0.981-0.995)</b> | —                                        | —                          |
| EPA + DHA                                     | —                                              | <b>0.985 (0.979-0.991)</b> | —                                        | —                          |
| PUFA                                          | —                                              | <b>0.989 (0.982-0.996)</b> | —                                        | —                          |
| Alcohol                                       | —                                              | <b>0.975 (0.970-0.979)</b> | <b>0.879 (0.840-0.919)</b>               | —                          |
| Red & Processed Meat                          | —                                              | <b>0.992 (0.986-0.998)</b> | <b>0.956 (0.92-0.991)</b>                | <b>0.983 (0.969-0.997)</b> |
| Refined Grains                                | <b>1.033 (1.026-1.039)</b>                     | —                          | —                                        | —                          |
| Empty Calories                                | <b>0.991 (0.987-0.994)</b>                     | —                          | —                                        | —                          |
| Sugar Sweetened Beverages<br>and Fruit Juices | —                                              | 0.999 (0.995-1.003)        | —                                        | —                          |
| Sugar Sweetened Beverages                     | —                                              | —                          | —                                        | <b>1.004 (0.989-1.019)</b> |
| Sodium                                        | <b>0.990 (0.983-0.996)</b>                     | 1.003 (0.994-1.012)        | —                                        | 1.014 (0.995-1.034)        |

<sup>1</sup>HR for 1 point increase in component score.

<sup>2</sup>Adjusted for age, race/ethnicity, education, marital status, physical activity, smoking, energy, body mass index, diabetes, alcohol (HEI-2010 and DASH only), hormone replacement therapy (women only), and the modified total index score for each index (total score-component *i*). HEI-2010, Healthy Eating Index-2010; AHEI-2010, Alternate Healthy Eating Index-2010; aMED, Alternate Healthy Eating Index; DASH, Dietary Approaches to Stop Hypertension.

Online Supporting Material

Supplemental TABLE 4. Multivariate HRs<sup>1</sup> and 95% CIs for cardiovascular disease mortality for each component of the HEI-2010, AHEI-2010, aMED, and DASH Score among women<sup>2</sup>

| Component                                     | HEI-2010                                        | AHEI-2010                  | aMED                         | DASH                       |
|-----------------------------------------------|-------------------------------------------------|----------------------------|------------------------------|----------------------------|
| Whole Grains                                  | <b>0.971 (0.962-0.980)</b>                      | <b>0.946 (0.930-0.963)</b> | <b>0.878 (0.838-0.921)</b>   | <b>0.941 (0.925-0.957)</b> |
| Total Vegetables                              | 0.995 (0.973-1.017)                             | —                          | —                            | —                          |
| Vegetables<br>Excluding Potatoes              | —                                               | 0.998 (0.988-1.007)        | 0.985 (0.937-1.034)          | 0.982 (0.965-1.000)        |
| Greens and Beans                              | <b>0.970 (0.957-0.984)</b>                      | —                          | —                            | —                          |
| Total Fruit                                   | 0.996 (0.976-1.017)                             | 0.993 (0.986-1.001)        | 1.009 (0.962-1.058)          | 1.013 (0.995-1.032)        |
| Whole Fruit                                   | 0.996 (0.976-1.016)                             | —                          | —                            | —                          |
| Nuts and Legumes                              | —                                               | <b>0.986 (0.978-0.993)</b> | —                            | <b>0.955 (0.938-0.972)</b> |
| Nuts                                          | —                                               | —                          | <b>0.908 (0.867-0.952)</b>   | —                          |
| Legumes                                       | —                                               | —                          | 0.992 (0.947-1.038)          | —                          |
| Seafood and Plant Proteins                    | <b>0.962 (0.947-0.978)</b>                      | —                          | —                            | —                          |
| Fish                                          | —                                               | —                          | <b>0.937 (0.895-0.982)</b>   | —                          |
| Total Protein Foods                           | 0.988 (0.966-1.010)                             | —                          | —                            | —                          |
| Low-Fat Dairy                                 | 0.993 (0.986-1.0002)                            | —                          | —                            | 0.984 (0.968-1.002)        |
| Ratio of Fatty Acids                          | <b>PUFA + MUFA/SF:<br/>0.992 (0.985-0.9996)</b> | —                          | MUFA/SF: 1.003 (0.960-1.049) | —                          |
| Trans Fat                                     | —                                               | <b>0.986 (0.977-0.996)</b> | —                            | —                          |
| EPA + DHA                                     | —                                               | <b>0.983 (0.974-0.993)</b> | —                            | —                          |
| PUFA                                          | —                                               | <b>0.995 (0.986-1.005)</b> | —                            | —                          |
| Alcohol                                       | —                                               | <b>0.976 (0.968-0.985)</b> | <b>0.842 (0.781-0.909)</b>   | —                          |
| Red & Processed Meat                          | —                                               | <b>0.980 (0.970-0.990)</b> | <b>0.912 (0.868-0.958)</b>   | 0.983 (0.964-1.002)        |
| Refined Grains                                | <b>1.025 (1.016-1.034)</b>                      | —                          | —                            | —                          |
| Empty Calories                                | <b>0.992 (0.988-0.997)</b>                      | —                          | —                            | —                          |
| Sugar Sweetened Beverages<br>and Fruit Juices | —                                               | 0.994 (0.989-1.0001)       | —                            | —                          |
| Sugar Sweetened Beverages                     | —                                               | —                          | —                            | <b>0.981 (0.963-0.999)</b> |
| Sodium                                        | <b>0.980 (0.971-0.988)</b>                      | 0.987 (0.973-1.001)        | —                            | 0.979 (0.954-1.006)        |

<sup>1</sup>HR for 1 point increase in component score.

<sup>2</sup>Adjusted for age, race/ethnicity, education, marital status, physical activity, smoking, energy, body mass index, diabetes, alcohol (HEI-2010 and DASH only), hormone replacement therapy (women only), and the modified total index score for each index (total score-component *i*). HEI-2010, Healthy Eating Index-2010; AHEI-2010, Alternate Healthy Eating Index-2010; aMED, Alternate Healthy Eating Index; DASH, Dietary Approaches to Stop Hypertension.

Online Supporting Material

Supplemental TABLE 5. Multivariate HRs<sup>1</sup> and 95% CIs for cancer mortality for each component of the HEI-2010, AHEI-2010, aMED, and DASH Score among men<sup>2</sup>

| Component                                     | HEI-2010                                       | AHEI-2010                   | aMED                                     | DASH                       |
|-----------------------------------------------|------------------------------------------------|-----------------------------|------------------------------------------|----------------------------|
| Whole Grains                                  | <b>0.981 (0.975-0.987)</b>                     | <b>0.962 (0.952-0.973)</b>  | <b>0.911 (0.884-0.939)</b>               | <b>0.964 (0.954-0.975)</b> |
| Total Vegetables                              | 0.998 (0.984-1.012)                            | —                           | —                                        | —                          |
| Vegetables<br>Excluding Potatoes              | —                                              | <b>0.985 (0.979-0.991)</b>  | <b>0.963 (0.933-0.994)</b>               | <b>0.974 (0.963-0.986)</b> |
| Greens and Beans                              | 0.999 (0.990-1.009)                            | —                           | —                                        | —                          |
| Total Fruit                                   | <b>0.972 (0.961-0.984)</b>                     | <b>0.983 (0.979-0.988)</b>  | <b>0.923 (0.895-0.951)</b>               | <b>0.964 (0.953-0.975)</b> |
| Whole Fruit                                   | <b>0.980 (0.969-0.990)</b>                     | —                           | —                                        | —                          |
| Nuts and Legumes                              | —                                              | 0.996 (0.991-1.001)         | —                                        | 0.991 (0.980-1.003)        |
| Nuts                                          | —                                              | —                           | 0.985 (0.956-1.016)                      | —                          |
| Legumes                                       | —                                              | —                           | 1.002 (0.972-1.033)                      | —                          |
| Seafood and Plant Proteins                    | 0.991 (0.980-1.002)                            | —                           | —                                        | —                          |
| Fish                                          | —                                              | —                           | 0.979 (0.949-1.008)                      | —                          |
| Total Protein Foods                           | 1.014 (0.996-1.033)                            | —                           | —                                        | —                          |
| Low-Fat Dairy                                 | <b>0.992 (0.987-0.997)</b>                     | —                           | —                                        | <b>0.986 (0.975-0.997)</b> |
| Ratio of Fatty Acids                          | <b>PUFA + MUFA/SF:<br/>0.982 (0.977-0.988)</b> | —                           | <b>MUFA/SF: 0.955 (0.927-<br/>0.983)</b> | —                          |
| Trans Fat                                     | —                                              | <b>0.993 (0.987-0.9995)</b> | —                                        | —                          |
| EPA + DHA                                     | —                                              | <b>0.987 (0.981-0.992)</b>  | —                                        | —                          |
| PUFA                                          | —                                              | <b>0.988 (0.982-0.994)</b>  | —                                        | —                          |
| Alcohol                                       | —                                              | <b>0.988 (0.984-0.992)</b>  | <b>0.948 (0.912-0.986)</b>               | —                          |
| Red & Processed Meat                          | —                                              | <b>0.988 (0.982-0.994)</b>  | <b>0.922 (0.892-0.953)</b>               | <b>0.971 (0.958-0.984)</b> |
| Refined Grains                                | <b>1.010 (1.004-1.016)</b>                     | —                           | —                                        | —                          |
| Empty Calories                                | <b>0.988 (0.985-0.992)</b>                     | —                           | —                                        | —                          |
| Sugar Sweetened Beverages<br>and Fruit Juices | —                                              | <b>1.013 (1.009-1.017)</b>  | —                                        | —                          |
| Sugar Sweetened Beverages                     | —                                              | —                           | —                                        | 1.013 (0.999-1.027)        |
| Sodium                                        | <b>0.991 (0.985-0.997)</b>                     | <b>1.010 (1.002-1.018)</b>  | —                                        | 1.005 (0.987-1.022)        |

<sup>1</sup>HR for 1 point increase in component score.

<sup>2</sup>Adjusted for age, race/ethnicity, education, marital status, physical activity, smoking, energy, body mass index, diabetes, alcohol (HEI-2010 and DASH only), hormone replacement therapy (women only), and the modified total index score for each index (total score-component *i*). HEI-2010, Healthy Eating Index-2010; AHEI-2010, Alternate Healthy Eating Index-2010; aMED, Alternate Healthy Eating Index; DASH, Dietary Approaches to Stop Hypertension.

Online Supporting Material

Supplemental TABLE 6. Multivariate HRs<sup>1</sup> and 95% CIs for cancer mortality for each component of the HEI-2010, AHEI-2010, aMED, and DASH Score among women<sup>2</sup>

| Component                                     | HEI-2010                                       | AHEI-2010                  | aMED                             | DASH                       |
|-----------------------------------------------|------------------------------------------------|----------------------------|----------------------------------|----------------------------|
| Whole Grains                                  | <b>0.982 (0.974-0.990)</b>                     | <b>0.957 (0.943-0.972)</b> | <b>0.882 (0.847-0.919)</b>       | <b>0.956 (0.942-0.970)</b> |
| Total Vegetables                              | 1.015 (0.996-1.036)                            | —                          | —                                | —                          |
| Vegetables<br>Excluding Potatoes              | —                                              | 0.997 (0.989-1.005)        | 1.005 (0.964-1.049)              | 0.992 (0.977-1.007)        |
| Greens and Beans                              | 0.995 (0.983-1.007)                            | —                          | —                                | —                          |
| Total Fruit                                   | 0.987 (0.970-1.004)                            | <b>0.989 (0.983-0.996)</b> | <b>0.933 (0.895-0.973)</b>       | 0.986 (0.971-1.001)        |
| Whole Fruit                                   | <b>0.981 (0.965-0.998)</b>                     | —                          | —                                | —                          |
| Nuts and Legumes                              | —                                              | <b>0.987 (0.981-0.994)</b> | —                                | <b>0.976 (0.961-0.991)</b> |
| Nuts                                          | —                                              | —                          | 0.966 (0.928-1.006)              | —                          |
| Legumes                                       | —                                              | —                          | 0.967 (0.929-1.006)              | —                          |
| Seafood and Plant Proteins                    | 0.987 (0.974-1.001):                           | —                          | —                                | —                          |
| Fish                                          | —                                              | —                          | 0.988 (0.949-1.028)              | —                          |
| Total Protein Foods                           | 1.016 (0.996-1.036)                            | —                          | —                                | —                          |
| Low-Fat Dairy                                 | <b>0.986 (0.979-0.992)</b>                     | —                          | —                                | <b>0.967 (0.952-0.981)</b> |
| Ratio of Fatty Acids                          | <b>PUFA + MUFA/SF:<br/>0.990 (0.984-0.996)</b> | —                          | MUFA/SF: 0.975 (0.939-<br>1.013) | —                          |
| Trans Fat                                     | —                                              | 0.996 (0.987-1.004)        | —                                | —                          |
| EPA + DHA                                     | —                                              | 0.998 (0.990-1.006)        | —                                | —                          |
| PUFA                                          | —                                              | 1.000 (0.992-1.008)        | —                                | —                          |
| Alcohol                                       | —                                              | 0.994 (0.987-1.0004)       | <b>0.942 (0.888-0.999)</b>       | —                          |
| Red & Processed Meat                          | —                                              | <b>0.984 (0.975-0.993)</b> | <b>0.927 (0.889-0.968)</b>       | 0.983 (0.967-1.001)        |
| Refined Grains                                | <b>1.013 (1.005-1.020)</b>                     | —                          | —                                | —                          |
| Empty Calories                                | <b>0.996 (0.991-0.9997)</b>                    | —                          | —                                | —                          |
| Sugar Sweetened Beverages<br>and Fruit Juices | —                                              | <b>1.007 (1.002-1.012)</b> | —                                | —                          |
| Sugar Sweetened Beverages                     | —                                              | —                          | —                                | 0.996 (0.980-1.012)        |
| Sodium                                        | <b>0.991 (0.983-0.999)</b>                     | 1.007 (0.995-1.019)        | —                                | 0.990 (0.967-1.013)        |

<sup>1</sup>HR for 1 point increase in component score.

<sup>2</sup>Adjusted for age, race/ethnicity, education, marital status, physical activity, smoking, energy, body mass index, diabetes, alcohol (HEI-2010 and DASH only), hormone replacement therapy (women only), and the modified total index score for each index (total score-component *i*). HEI-2010, Healthy Eating Index-2010; AHEI-2010, Alternate Healthy Eating Index-2010; aMED, Alternate Healthy Eating Index; DASH, Dietary Approaches to Stop Hypertension.

## Online Supporting Material

### Supplemental Figure 1

**Figure 1.** Multivariate HRs and 95% CIs for all-cause, CVD, and cancer mortality comparing highest (Q5) to lowest quintile index scores (Q1) for the HEI-2010, AHEI-2010, aMED, and DASH Score among men (n=242,321) and women (n=182,342) in the NIH-AARP Diet and Health Study<sup>1</sup>

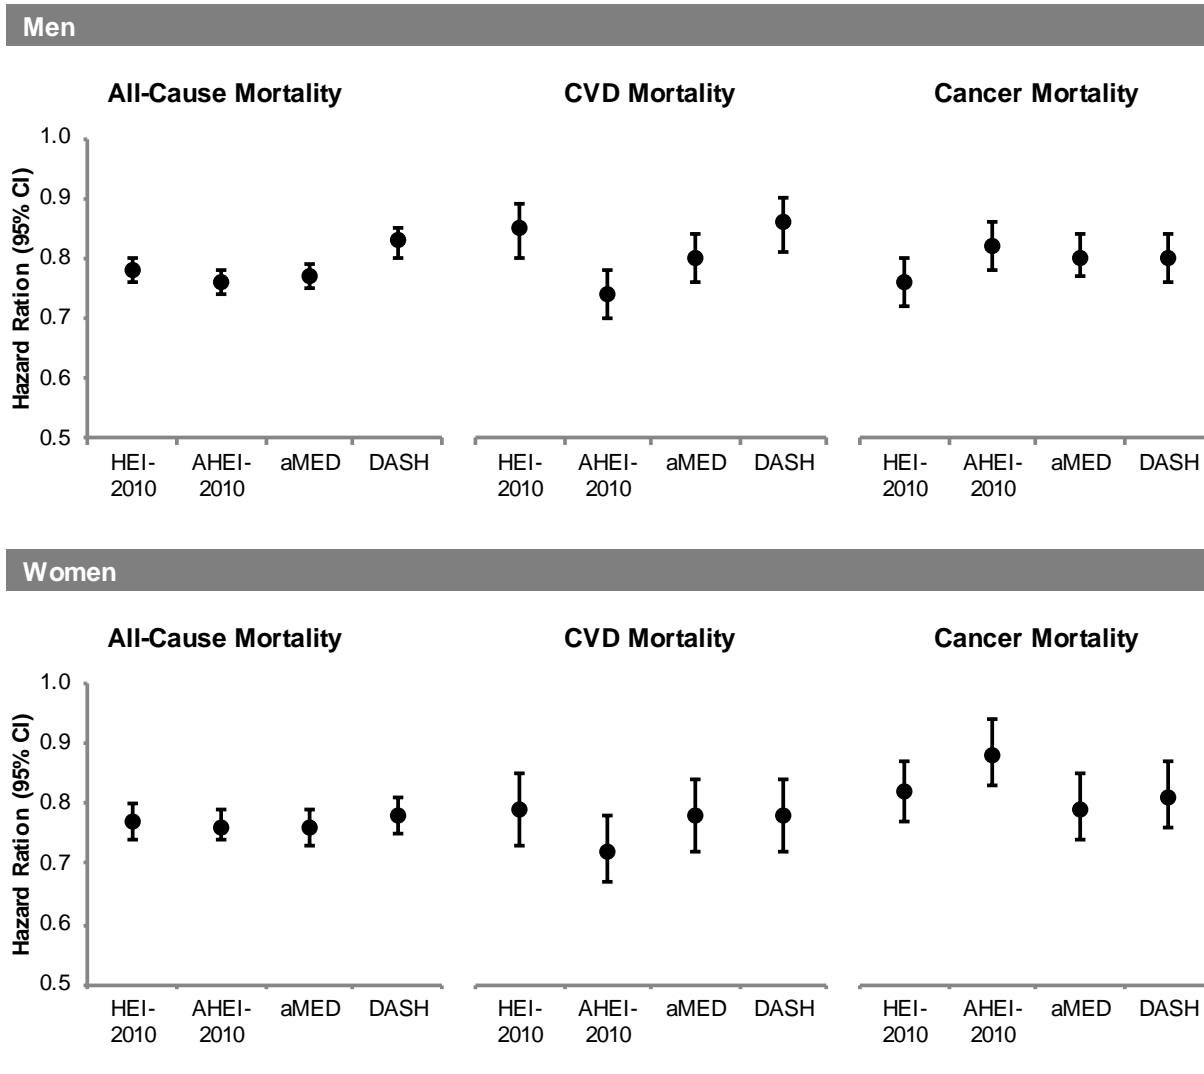

<sup>1</sup> Adjusted for age, race/ethnicity, education, marital status, physical activity, smoking, energy, body mass index, diabetes, alcohol (HEI-2010 and DASH only), and hormone replacement therapy (women only). HEI-2010, Healthy Eating Index-2010; AHEI-2010, Alternate Healthy Eating Index-2010; aMED, Alternate Healthy Eating Index; DASH, Dietary Approaches to Stop Hypertension; Q1, quintile 1; Q5, quintile 5.
